# Supplementary material
Source: Royal Society of Chemistry journal article supplement (https://www.rsc.org/suppdata/jm/1999/1097/806860g.doc)
Supplement: Supplementary file 1 [file 806860g.doc]

**Supplementary material**

**Peptide purification and characterisation**

HPLC gradients:

Gradient A: 0-12.5 min 65% methanol; 12.5-75 min 65%-85% methanol

75-80 min 85%-100% methanol.

Gradient B: 0-5 min 75% methanol; 5-25 min 75%-85% methanol

25-35 min 85%-100% methanol 35-40 min 100% methanol.

Gradient C: 0-40 min 85%-95% methanol

Gradient D: 0-15 min 80% DMF in water; 15-35 min 80-100% DMF.

Detection was at 320 nm, flow rate 3 ml min-1.

Gradient E: 0-5 min 75% methanol; 5-55 min 75-100% methanol.

Detection was at 269 nm.

ES-MS: the measured ions are quoted as: observed *m/z* [calculated *m/z*] (assignment)z+.

**Oligopeptide 1: Fcb-13Met3 (Fcb-Ala-Aib-Ala-Met-Aib-Ala-Ala-Met-Ala-Aib-Met-Ala-Ala-NH2)**

Oxygen-free cleavage afforded the crude peptide amide as a green and white solid.

A sample was analysed by HPLC (analytical column, gradient A) and two peaks were collected after 60 and 65 min in ratios from 1:30 to 1:8.

ES-MS: (M = 1417.6)

1st peak: 1417.7 [1418.6] (peptide + H)+

1400.6 [1401.6] (peptide - NH3 + H)+ 755.4 [755.9] (peptide + 2K + O)2+

740.7 [739.9] (peptide + Na + K)2+ 732.5 [731.1] (peptide + 2Na)2+

720.4 [720.8] (peptide + H + Na)2+ 717.5 [717.8] (peptide + 2H + O)2+

709.5 [709.8] (peptide + 2H)2+ 700.9 [701.3] (peptide - NH3 + 2H)2+

2nd peak: 1418.4 [1418.6] (peptide + H)+

1400.7 [1401.6] (peptide - NH3 + H)+  740.9 [739.9] (peptide + Na + K)2+

732.6 [731.1] (peptide + 2Na)2+ 700.9 [701.3] (peptide - NH3 + 2H)+

665.4 [665.8] (peptide - Ala - NH3 + 2H)2+

**Oligopeptide 2: Fcp-12Leu2 (Fcp-Ala-Aib-Ala-Ala-Leu-Aib-Ala-Ala-Ala-Aib-Leu-Ala-NH2)**

Cleavage under an ambient atmosphere afforded the crude peptide amide as a green and white solid. HPLC (analytical column, gradient A) detected peaks at 56 and 62 min in the ratio 15:1.

ES-MS of the crude peptide (M = 1236.3):

1274.8 [1275.4] (peptide + K)+ 1258.8 [1259.3] (peptide + Na)+

1236.8 [1237.3] (peptide + H)+ 1219.8 [1220.3] (peptide - NH3 + H)+

638.1 [638.2] (peptide + K +H)2+ 629.9 [630.1] (peptide + Na + H)2+

619.1 [619.1] (peptide + 2H)2+ 610.3 [610.7] (peptide -NH3 + 2H)2+

585.6 [583.6] (peptide -Ala + 2H)2+

**Oligopeptide 3: X-16Met3 (X = Ac, Fcb or NB; X-Ala-Ala-Aib-Ala-Met-Ala-Phe-Ala-Met-Aib-Phe-Met-Aib-Ala-Ala-Ala-NH2)**

**Ac-16Met3-NH2**

Cleavage under an ambient atmosphere afforded a white powder which was purified by HPLC (semi-prep. column, gradient B) and fractions eluting after 19 and 28 min in the ratio 1:9 were collected and analysed. The 28 min fractions containing the desired peptide were combined and concentrated *in vacuo* to a white powder. ES-MS (M = 1570.9):

19 min peak:

1624.5 [1626.0] (peptide + K + O)+ or [1625.9] (peptide + Na + 2O)+

1609.1 [1610.0] (peptide + K)+ or [1609.9] (peptide + Na + O)+

1586.5 [1587.9] (peptide + H + O)+

821.2 [821.5] (peptide + H + K + 2O)2+

816.2 [816.5] (peptide + Na + K)2+ or (peptide + 2Na + O)2+

805.3 [805.5] (peptide + H + K)2+ or (peptide + H + Na + O)2+

794.2 [794.4] (peptide + 2H + O)2+ 785.7 [786.4] (peptide + 2H)2+

28 min peak:

1593.0 [1593.9] (peptide + Na)+ 1570.9 [1571.9] (peptide + H)+

1553.9 [1554.9] (peptide - NH3 + H)+ 816.1 [816.5] (peptide + Na + K)2+

808.1 [808.5] (peptide + 2Na)2+ 797.1 [797.5] (peptide + Na + H)2+

**Fcb-16Met3**

Oxygen-free cleavage afforded the crude peptide as a yellow powder which was purified by HPLC (semi-prep. column, eluting isocratically with 90% methanol). Fractions eluting after 7 and 9 min in the ratio 1:7 were collected and analysed.

ES-MS: (M = 1782.0)

7 min peak

931.1 [930.1] (peptide + 2K)2+ or (peptide + Na + K + O)+

or (peptide + 2Na +2O)2+

922.4 [922.0] (peptide + 2Na + O)2+ or (peptide + Na + K)2+

919.5 [919.0] (peptide + H + K + O)2+

911.6 [911.0] (peptide + H + Na + O)2+ or (peptide + H + K)2+

903.3 [903.0] (peptide + H + Na)2+ 900.4 [900.0] (peptide + 2H + O)2+

891.6 [892.0] (peptide + 2H)2+

9 min peak: 1818.9 [1821.1] (peptide + K)+

1803.8 [1805.0] (peptide + Na) 1781.3 [1783.0] (peptide + H)+

1764.4 [1766.0] (peptide - NH3 +H)+ 922.4 [922.0] (peptide + Na + K) 2+

919.1 [919.0] (peptide + H + K + O)2+ 911.6 [911.0] (peptide + H + K)2+

903.3 [903.0] (peptide + H + Na)2+ 883.4 [883.5] (peptide - NH3 + 2H)2+

**NB-16Met3**

Cleavageunder an ambient atmosphere afforded a white solid. A sample was purified by HPLC (semi-prep. column, gradient B) and two fractions in the ratio 1:3.5 were collected after 24 and 30 min.

ES-MS: (M = 1678.0)

1st fraction: 839.2 [840.0] (peptide + 2H)2+ 847.7 [848.0] (peptide + 2H + O)2+

2nd fraction: 839.8 [840.0] (peptide + 2H)2+

**Oligopeptide 4: X-16Nle3 (X = Ac, Fcb or NB; X-Ala-Ala-Aib-Ala-Nle-Ala-Phe-Ala-Nle-Aib-Phe-Nle-Aib-Ala-Ala-Ala-NH2)**

**Ac-16Nle3**

Cleavage under an ambient atmosphere afforded crude Ac-16Nle3 as a white solid which was purified by HPLC (semi-prep. column, eluting isocratically with 90% methanol). Fractions eluting after 7 and 9 min in the ratio 1:31 were collected and analysed. The 2nd fraction, containing the desired peptide, was concentrated *in vacuo* to a white powdery solid.

ES-MS: (M = 1516.8)

2nd peak:

1554.1 [1555.9] (peptide + K)+ 1538.2 [1539.8] (peptide + Na)+

1516.2 [1517.8] (peptide + H)+ 1499.4 [1500.8] (peptide - NH3 + H)+

797.2 [797.5] (peptide + 2K)2+ 789.3 [789.4] (peptide + Na + K)2+

781.2 [781.4] (peptide + 2Na)2+ 778.1 [778.4] (peptide + H + K)2+.

**Fcb-16Nle3**

Following cleavage ubder an ambient atmosphere the crude peptide was obtained as a green solid which was purified by HPLC (semi-prep. column, gradient C). Peaks eluting after 25 and 29 min in the ratio 1:8 were observed and the major peak was collected and analysed:

ES-MS (M = 1727.7)

1767.4 [1766.8] (peptide + K)+ 1751.6 [1750.7] (peptide + Na)+

1729.3 [1728.7] (peptide + H)+ 1712.6 [1711.7] (peptide - NH3 + H)+

895.5 [894.9] (peptide + Na + K)2+ 887.4 [886.9] (peptide + 2Na)2+

884.5 [883.9] (peptide + H + K)2+ 876.6 [875.9] (peptide + H + Na)2+

865.6 [864.9] (peptide + 2H)2+ 856.7 [856.4] (peptide -NH3 + H)+

**NB-16Nle3**

Cleavage under an ambient atmosphere afforded the desired peptide as a white solid:

ES-MS (M = 1623.9)

835.1 [834.9] (peptide + 2Na)2+ 824.0 [823.9] (peptide + H + Na)2+

812.8 [812.9] (peptide + 2H)2+ 804.7 [804.4] (peptide -NH3 + 2H)2+.

**Oligopeptide 6: X-16Cys2 (X = H, Ac or Fcb; X-Ala-Ala-Aib-Ala-Phe-Ala-Cys-Phe-Leu-Cys-Aib-(NO2)Phe-Ala-Aib-Leu-Ala-OH)**

**Fcb-16Cys2(SH)2**

Cleavage under either oxygen-free or ambient conditions afforded the crude peptide as a green and yellow or as a yellow precipitate, respectively.

ES-MS:

Fcb-16Cys2(SH)2-OH (M = 1872.0) 956.0 [956.0] (peptide + H + K)2+

947.8 [948.0] (peptide + H + Na)2+ 936.4 [937.0] (peptide + 2H)2+

**Fcb-16Cys2(S2)**

(A) Attempted preparation by disulphide formation with iodine in DMF.

Fmoc‑16Cys2(Trt)2-O-resin (199 mg, 150 mol of peptide) was swelled in DMF for 1 h and cooled by an ice-bath. A solution of iodine (38 mg, 150 mol) in DMF (0.5 ml) was added and the mixture was agitated occasionally with continued cooling. After 1 h 40 min the solution was removed *via* syringe and the resin was washed with DMF until the solvent remained clear. The peptide was deprotected and acylated by Fcb-OH (2 x 45 min) in DMF according to the standard procedures.

Following cleavage under an ambient atmosphere the peptide was obtained as a green solid, a sample of which was purified by HPLC (semi-prep., gradient D, detection at 320 nm). The main peak eluting after 38 min was characterised by ES-MS as the disulphide-dimerised peptide {Fcb-16Cys2(S2) }2 (M = 3740.0):

1260.3 [1260.4] (dimer + K + 2H)3+ 1247.9 [1247.7] dimer + 3H)3+

962.4 [962.0] (dimer + 3Na + K)4+ 956.6 [955.0] (dimer + 2K + 2H)4+

952.8 [952.5] (dimer + 3Na + H)4+ 945.1 [945.5] (dimer + K + 3H)4+

942.2 [941.5] (dimer + Na + 3H)4+ 936.0 [936.0] (dimer + 4H)4+

(B) Preparation by disulphide formation with iodine in acetonitrile.

Fmoc-16Cys2(Trt)2-O-resin (44 mg, 8 mol of peptide) was N-deprotected using the standard protocol. The washed, free-amine peptide resin was cooled in an ice-bath and treated with iodine (8 mg, 32 mol) in acetonitrile (400 l). The reaction mixture was gently agitated occasionally and after 1.5 h the solution was removed by syringe and the beads were washed with acetonitrile, dichloromethane, carbon tetrachloride and acetonitrile (2 x 1 ml each). The peptide-resin was N-acylated with 4-ferrocene butyric acid in the usual manner.

Cleavage with TFA-TIPS under oxygen-free conditions afforded the desired peptide as a yellow and white powder:

ES-MS.

Fcb-16Cys2(S2)-OH (M = 1870.0) 955.2 [955.0] (peptide + H + K)2+

946.5 [947.0] (peptide + H +Na)2+ 936.2 [936.0] (peptide + 2H)2+

**Ac-16Cys2(S2)**

Ac-16Cys2(Trt)2-O-resin was cleaved by TIPS in 95% TFA-methanol under an ambient atmosphere for 1.5 h. The filtered cleavage mixture (15 ml total volume) was agitated in a water bath (bath temperature 40-45oC) for 15 min before the solvents were removed under reduced pressure. The colourless oil was precipitated, centrifuged and dried in the standard manner to afford crude peptide which was determined by ES-MS to be the peptide disulphide, Ac-ASP6(S2), as a mixture of acid (M = 1658.9): 829.8 [830.4] (peptide + 2H)2+

and methyl ester (M = 1672.9):

856.2 [856.4] (peptide +H + K)2+ 848.3 [848.4] (peptide +Na + H)2+

837.1 [837.4] (peptide + 2H)2+

**H-ASP6(Trt)2-OMe** by cleavage with LiBr/DBU/methanol

H-ASP6(Trt)2-resin was washed with acetic acid (1 ml), dichloromethane (2 ml) and methanol (3 x 2 ml). Methanol (anhydrous, 2.8 ml) and lithium bromide (100 l of a 0.3 M solution in anhydrous methanol) were added to the beads. After 20 min DBU (5 l) was added, the reaction vessel was gently agitated and the beads were allowed to stand for 2.5 h. Further lithium bromide (62 mg, 0.7 mmol) in methanol (anhydrous, 1 ml) and DBU (10 l) were added and the mixture was left standing for another 22 h. The solution was removed *via* syringe and the beads were washed with methanol (3 ml, 2 ml). The combined methanol solutions were concentrated under reduced pressure to a colourless oil which was analysed by HPLC (semi-prep. column, gradient E, detection at 269 nm). The three main peaks that eluted after 12, 36 and 51 min. (approx. ratio 1:3:1) were collected and analysed by ES-MS:

2nd peak:

Ac-ASP6(Trt)2-OMe (M = 2159.5)

2181.0 [2182.5] (peptide + Na)+ 1109.9 [1110.8] (peptide + Na + K)2+

1102.3 [1102.8] (peptide + K + Li)2+ 1094.2 [1094.7] (peptide + Na + Li)2+

Ac-ASP6(Trt)2-OH (M = 2145.5)

2183.6 [2184.5] (peptide + K)+

Ac-ASP6(Trt)(SH)-OMe (M = 1917.2)

1956.4 [1956.3] (peptide + K)+ 1940.5 [1940.2] (peptide + Na)+

3rd peak:

Ac-ASP6(Trt)2-OMe (M = 2159.5) 2200.6 [2198.6] (peptide + K)+

1109.2 [1110.8] (peptide + K + Na)2+ 1101.8 [1102.3] (peptide + K + Li)2+

H-ASP6(Trt)2-OMe (M = 2117.5) 1065.9 [1065.7] (peptide + 2Li)2+

1062.8 [1062.7] (peptide + Li + H)2+ 1058.8 [1059.7] (peptide + 2H)2+
